# Supplementary material for: Regulation of Inducible Potassium Transporter KdpFABC by the KdpD/KdpE Two-Component System in Mycobacterium smegmatis
Source: PubMed Central journal article supplement (PMC5401905; doi:10.3389/fmicb.2017.00570), 2017-04-24

*M. smegmatis* MC<sup>2</sup>155

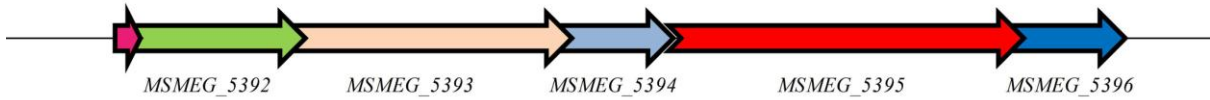

*M. vanbaalenii*

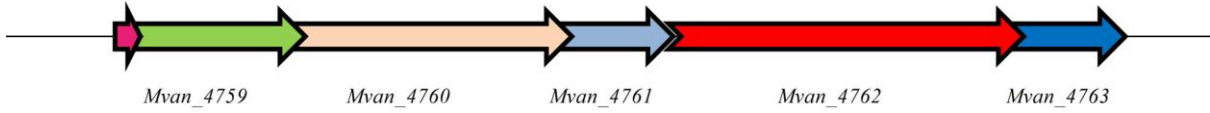

*M. marinum*

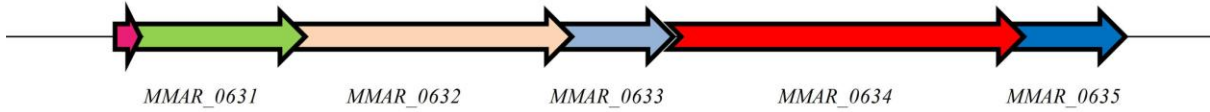

*M. neoaurum*

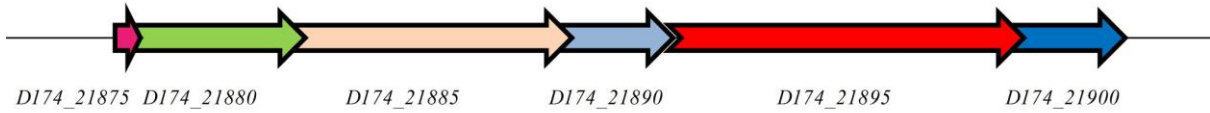

*M. sp. JLS*

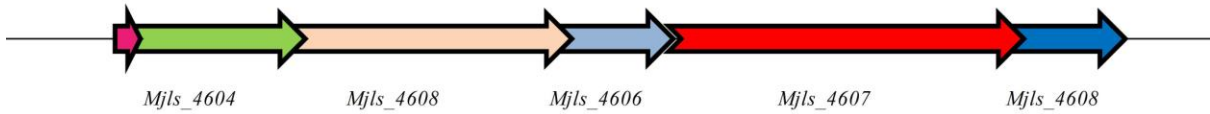

*M. sp. MCS*

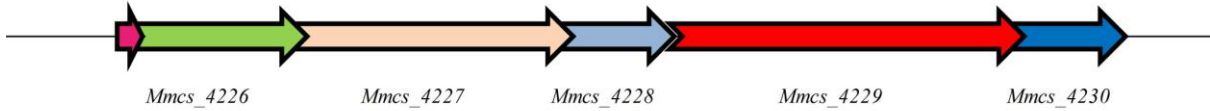

*M. sp. KMS*

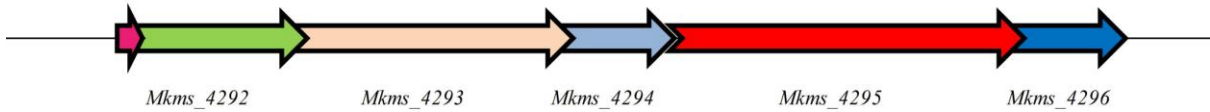

*M. sp. EPa45*

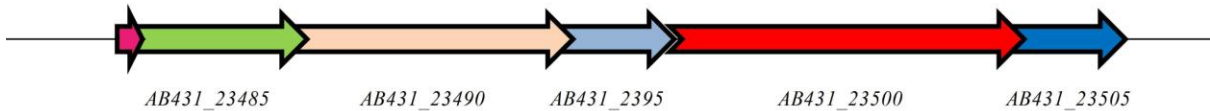

*M. sp. JS623*

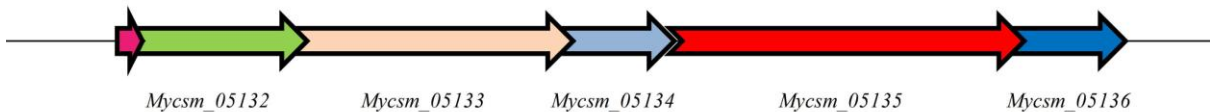

*M. haemophilum*

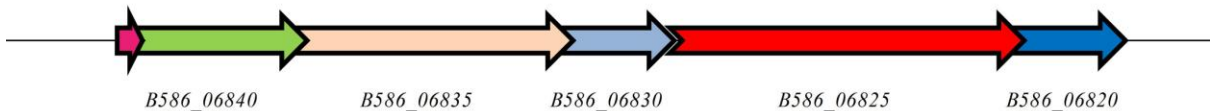

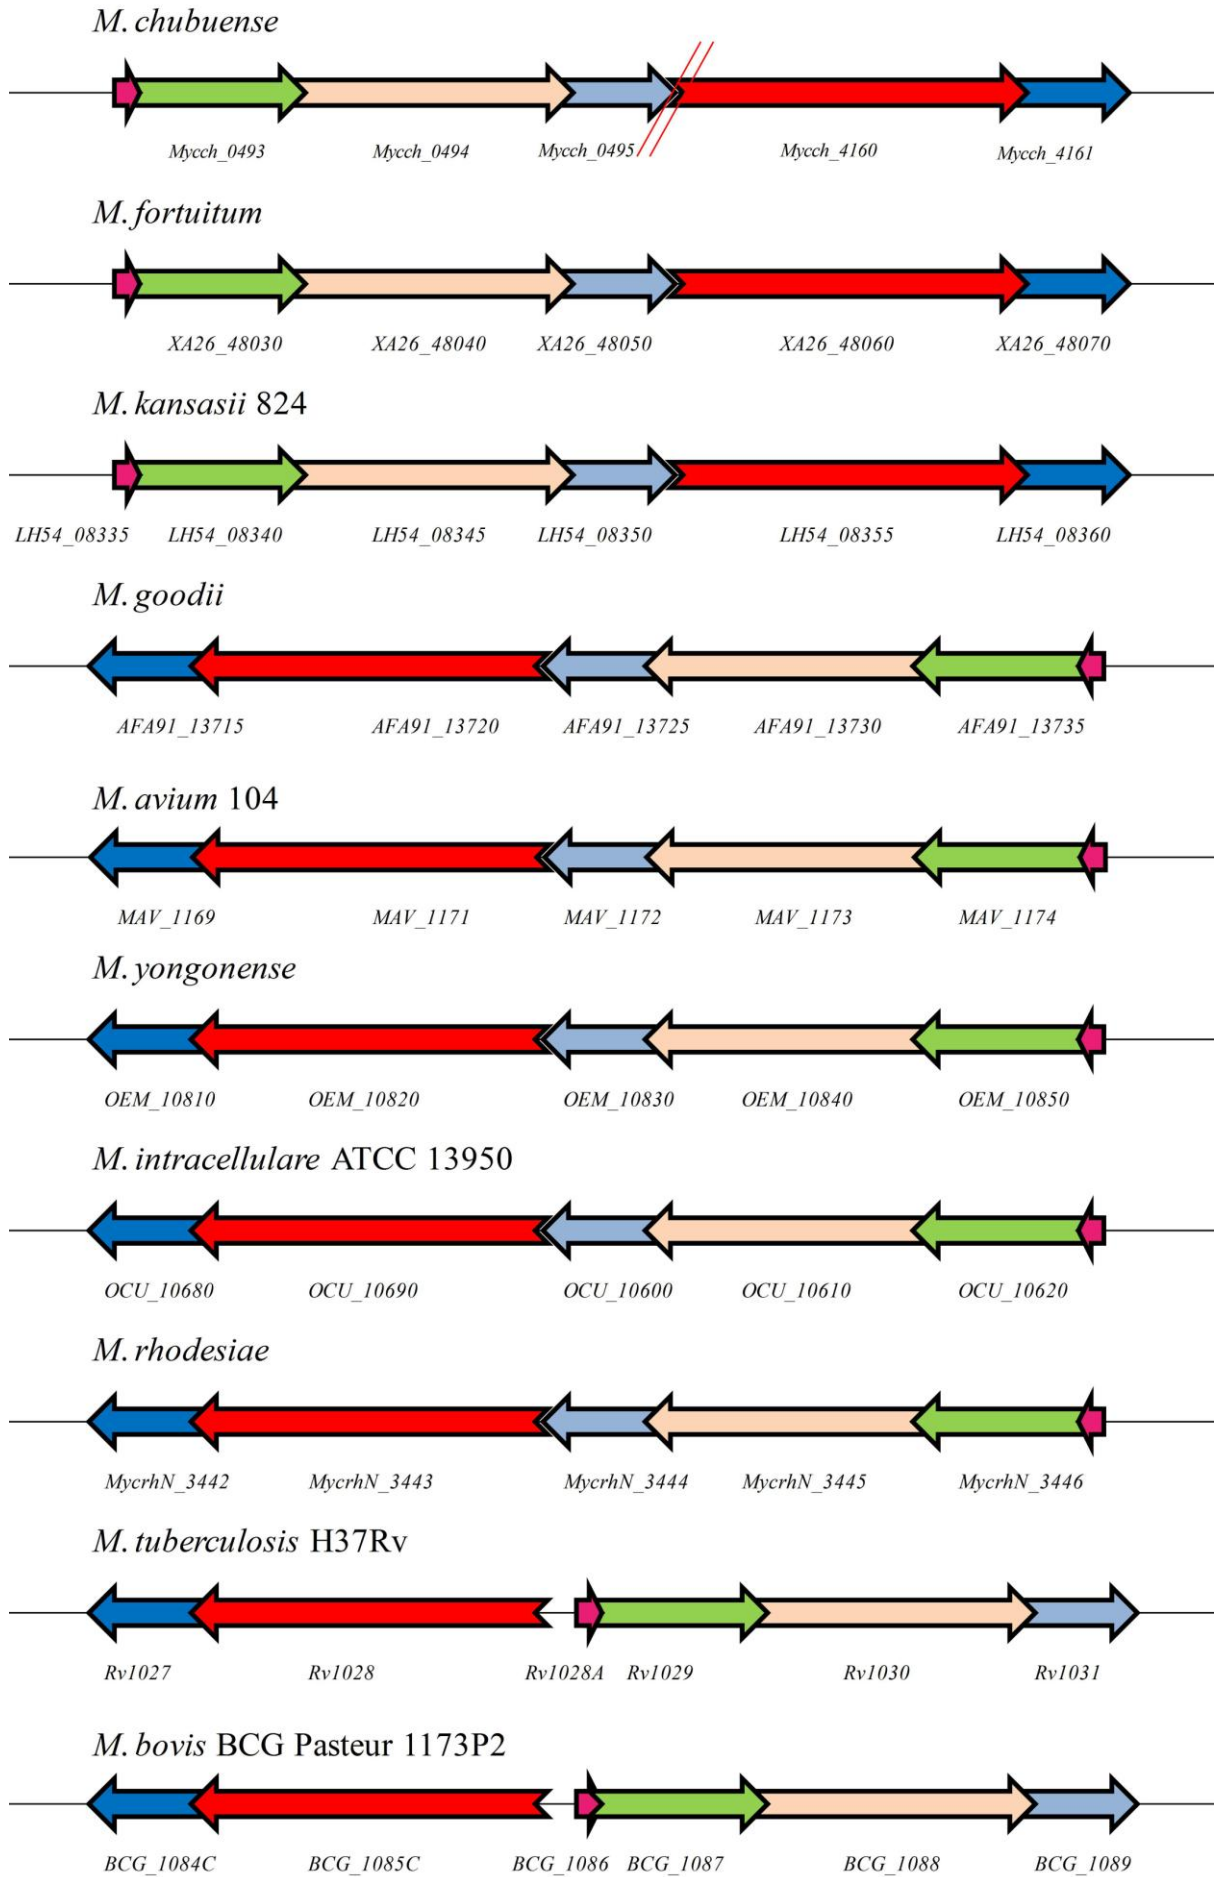

Supplement: Image8.pdf [file Image8.pdf]
